# Supplementary material for: Transcriptional and cell type profiles of cortical brain regions showing ultradian cortisol rhythm dependent responses to emotional face stimulation
Source: PubMed Central journal article supplement (PMC9842700; doi:10.1016/j.ynstr.2023.100514), 2023-01-04
Supplement: mmc1.pdf [file mmc1.pdf]

# PheWeb 2019

Bar Graph

Table

Clustergram

Appyter

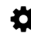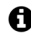

Click the bars to sort. Now sorted by combined score ranking.

p-value: 0.0004546  
q-value: 0.09910  
odds ratio: 24.50  
combined score: 188.58

Acute reaction to stress

Chronic cystitis

Other symptoms involving urinary system

Amblyopia

Cancer of the gums

Diseases of the larynx and vocal cords

Hyperventilation

Lipoprotein disorders

Nerve root and plexus disorders

Abnormal involuntary movements
