# Supplementary material for: Transcriptional and cell type profiles of cortical brain regions showing ultradian cortisol rhythm dependent responses to emotional face stimulation
Source: PubMed Central journal article supplement (PMC9842700; doi:10.1016/j.ynstr.2023.100514), 2023-01-04
Supplement: mmc3.pdf [file mmc3.pdf]

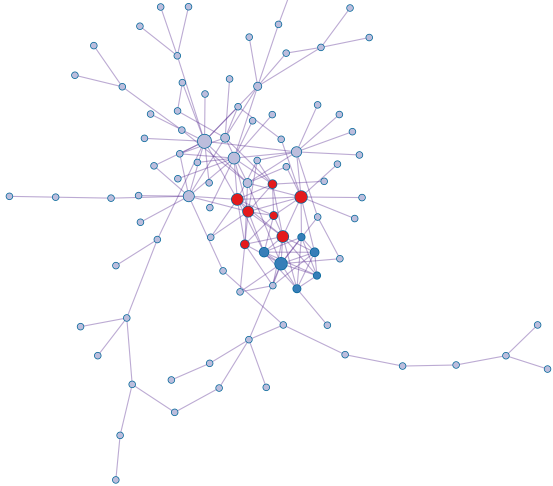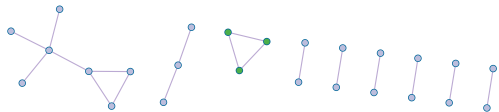

■ MCODE1

■ MCODE2

■ MCODE3

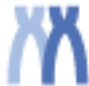

created by

<http://metascape.org>
